# Supplementary material for: An oxidized abasic lesion inhibits base excision repair leading to DNA strand breaks in a trinucleotide repeat tract
Source: PubMed Central journal article supplement (PMC5794147; doi:10.1371/journal.pone.0192148), 2018-02-01
Supplement: pone.0192148.s002.pdf [file pone.0192148.s002.pdf]

**S1 Table. Oligonucleotide sequences**

| Oligonucleotides          | nt | Sequence (5' -3')                                                         |
|---------------------------|----|---------------------------------------------------------------------------|
| Downstream/Damaged strand |    |                                                                           |
| D1                        | 32 | <b>U</b> CAG CAG CAG CAG ATG CCC GCC CCA CTC ATT GC                       |
| D2                        | 32 | <b>F</b> CAG CAG CAG CAG ATG CCC GCC CCA CTC ATT GC                       |
| D3                        | 32 | <b>D</b> CAG CAG CAG CAG ATG CCC GCC CCA CTC ATT GC                       |
| D4                        | 16 | <b>p</b> CGT GCG GAT CCG GTG C                                            |
| D5                        | 32 | <b>p</b> CAG CAG CAG CAG ATG CCC GCC CCA CTC ATT GC                       |
| D6                        | 48 | CTG GAT ACA CGA ACT TTA AGC AUA GTC AAT GAA GGA CGC ATA TCA GTG           |
| Template strand           |    |                                                                           |
| T1                        | 55 | GCA ATG AGT GGG GCG GGC ATC TGC TGC TGC TGC TGT ACG GGC GCT AGG CGA CTC G |
| T2                        | 46 | GCA ATG AGT GGG GCG GGC ATC TGC TGT ACG GGC GCT AGG CGA CTC G             |
| T3                        | 31 | GCA CCG GAT CCG CAC GGC GCA TCA GCT GCA G                                 |
| T4                        | 48 | CAC TGA TAT GCG TCC TTC ATT GAC TCT GCT TAA AGT TCG TGT ATC CAG           |
| Upstream strand           |    |                                                                           |
| U1                        | 34 | CGA GTC GCC TAG CGC CCG TAC AGC AGC AGC AGC A                             |
| U2                        | 20 | CGA GTC GCC TAG CGC CCG TA                                                |
| U3                        | 15 | CTG CAG CTG ATG CGC                                                       |

**U:** deoxyuridine

**F:** tetrahydrofuran, THF

**D:** 5'-(2-phosphoryl-1,4-dioxobutane), DOB

**p:** phosphate
