# Supplementary material for: An oxidized abasic lesion inhibits base excision repair leading to DNA strand breaks in a trinucleotide repeat tract
Source: PubMed Central journal article supplement (PMC5794147; doi:10.1371/journal.pone.0192148), 2018-02-01

S1 Fig

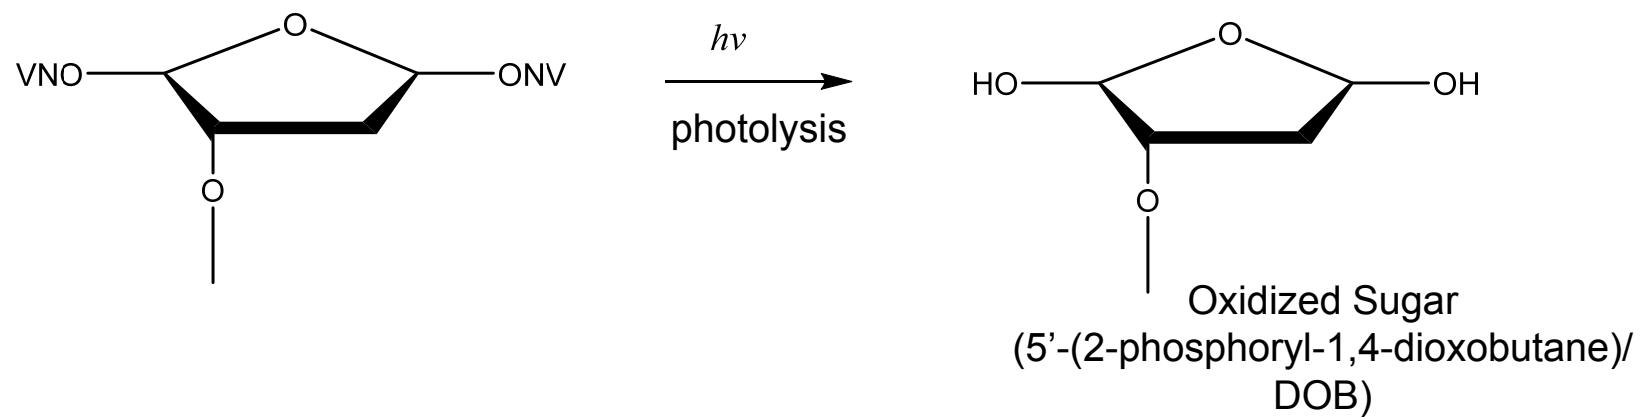

ONV= *o*-nitrobenzyl protecting group

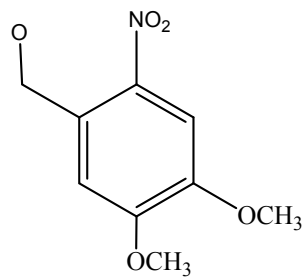

Supplement: pone.0192148.s003.pdf [file pone.0192148.s003.pdf]
